# Supplementary material for: Determinants of adherence to personal preventive behaviours based on the health belief model: a cross-sectional study in South Korea during the initial stage of the COVID-19 pandemic
Source: Springer Nature journal article supplement (doi:10.1186/s12889-022-13355-x), 2022-05-11
Supplement: MOESM1 [file 20392732]

1 **Supplementary file (questionnaire)**

2

3 **I. Sociodemographic questions**

4

5 **SQ1. Sex**

- 6 1. Male 2. Female

7

8 **SQ2. Age**

- 9 1. 20-29 2. 30-39 3. 40-49 4. 50-59

10

11 **SQ3. Education**

- 12 1. Less than bachelor's degree 2. Bachelor's degree 3. Master's or higher

13

14 **SQ4. monthly household income (10,000 KRW)\***

- 15 1. <300 2. 300 <600 3. ≥600

16 \*KRW: Currency of Korea (1,000 KRW is approximately 1 USD)

17

18 **SQ5 Marital status**

- 19 1. Marital 2. never married 3. Divorced 4. Widowed 5. separated

20

21 **II. Health Belief model**

22 다음에 제시되는 코로나 19 예방수칙과 관련하여 귀하께서 동의하는 정도를 각각 답해  
23 주세요.

24 Please answer the degree to which you agree with the following COVID-19 prevention measures.

25

| No. | Questions                                                                                                                                     | Scale                                   |   |   |   |   |   |   |
|-----|-----------------------------------------------------------------------------------------------------------------------------------------------|-----------------------------------------|---|---|---|---|---|---|
|     |                                                                                                                                               | (1=strongly disagree, 7=strongly agree) |   |   |   |   |   |   |
| 1   | <p>예방수칙을 수행하지 않으면 코로나 19에 감염될 가<br/>           능성이 높아질 것 같다<br/>           If I do not take precautions, I think I will be more likely to</p> | ①                                       | ② | ③ | ④ | ⑤ | ⑥ | ⑦ |

|   |                                                                                                                                                      |   |   |   |   |   |   |   |
|---|------------------------------------------------------------------------------------------------------------------------------------------------------|---|---|---|---|---|---|---|
|   | be infected with COVID-19.                                                                                                                           |   |   |   |   |   |   |   |
| 2 | 예방수칙을 수행하지 않으면 코로나 19에 걸릴까봐 걱정된다.<br>If I do not take precautions, I worry that I will be infected with COVID-19.                                    | ① | ② | ③ | ④ | ⑤ | ⑥ | ⑦ |
| 3 | 만약 코로나 19에 감염된다면, 경제상황이 악화될 것 같다.<br>If I am infected with COVID-19, my financial status will likely become worse.                                   | ① | ② | ③ | ④ | ⑤ | ⑥ | ⑦ |
| 4 | 나는 코로나 19에 감염된다면, 오랫동안 힘들 것 같다.<br>If I am infected with the COVID-19, it will impact me severely.                                                   | ① | ② | ③ | ④ | ⑤ | ⑥ | ⑦ |
| 5 | 예방수칙을 수행하면 안심이 된다.<br>I feel relieved when I follow the precautions.                                                                                 | ① | ② | ③ | ④ | ⑤ | ⑥ | ⑦ |
| 6 | 예방수칙을 수행하면 코로나 19가 감염되는 것을 방지할 수 있을 것 같다.<br>If I follow the preventive behaviours, doing so will reduce the risk of getting infected with COVID-19. | ① | ② | ③ | ④ | ⑤ | ⑥ | ⑦ |
| 7 | 예방수칙을 수행하는 일은 성가시고 불편한 일이다.<br>It is annoying and uncomfortable to follow the preventive behaviours.                                                 | ① | ② | ③ | ④ | ⑤ | ⑥ | ⑦ |
| 8 | 예방수칙을 수행하면 사회적 관계가 멀어질 것 같다.<br>If I take precautions, I am afraid I will be socially disconnected.                                                  | ① | ② | ③ | ④ | ⑤ | ⑥ | ⑦ |
| 9 | 나는 예방수칙을 잘 수행할 수 있다.<br>I am able to follow the preventive behaviours.                                                                               | ① | ② | ③ | ④ | ⑤ | ⑥ | ⑦ |

26

27

### 28 III. Health Behaviour

29 귀하는 코로나 바이러스 19가 발생한 이후, 다음과 같은 예방수칙을 실천하였습니까?

30 Have you adhered to the following preventive behaviours since the outbreak of COVID-19?

31 (1=strongly disagree, 7=strongly agree)

32

| No. | Preventive behaviours          | Scale<br>(1=strongly disagree, 7=strongly agree) |   |   |   |   |   |   |
|-----|--------------------------------|--------------------------------------------------|---|---|---|---|---|---|
|     |                                | ①                                                | ② | ③ | ④ | ⑤ | ⑥ | ⑦ |
| 1   | Frequent hand hygiene          | ①                                                | ② | ③ | ④ | ⑤ | ⑥ | ⑦ |
| 2   | Respiratory etiquette          | ①                                                | ② | ③ | ④ | ⑤ | ⑥ | ⑦ |
| 3   | Wearing a mask                 | ①                                                | ② | ③ | ④ | ⑤ | ⑥ | ⑦ |
| 4   | Environmental cleaning at home | ①                                                | ② | ③ | ④ | ⑤ | ⑥ | ⑦ |
| 5   | Self-quarantine                | ①                                                | ② | ③ | ④ | ⑤ | ⑥ | ⑦ |

33

34 **IV. Cues to take action**

35 귀하께서는 2020년 1월 한국에서 코로나바이러스 19가 발생한 이후부터 다음의 각 정보원

36 을 통해 공유된 “코로나 바이러스 19” 관련정보를 얼마나 많이 신뢰하십니까?

37 How much do you trust the COVID-19-related information that you obtain through each of the  
38 following sources since the outbreak of COVID-19 in Korea in January 2020

| No. | Reliable channels/resources | Scale<br>(1=No trust at all, 7=most information<br>can be trusted) |   |   |   |   |   |   |
|-----|-----------------------------|--------------------------------------------------------------------|---|---|---|---|---|---|
|     |                             | ①                                                                  | ② | ③ | ④ | ⑤ | ⑥ | ⑦ |
| 1   | Printed media               | ①                                                                  | ② | ③ | ④ | ⑤ | ⑥ | ⑦ |
| 2   | TV                          | ①                                                                  | ② | ③ | ④ | ⑤ | ⑥ | ⑦ |
| 3   | Radio                       | ①                                                                  | ② | ③ | ④ | ⑤ | ⑥ | ⑦ |
| 4   | Health care providers       | ①                                                                  | ② | ③ | ④ | ⑤ | ⑥ | ⑦ |
| 5   | Official government website | ①                                                                  | ② | ③ | ④ | ⑤ | ⑥ | ⑦ |
| 6   | Social networks             | ①                                                                  | ② | ③ | ④ | ⑤ | ⑥ | ⑦ |
| 7   | Family and friends          | ①                                                                  | ② | ③ | ④ | ⑤ | ⑥ | ⑦ |

39

40
